# Supplementary material for: Metabolic Mechanism of Plant Defense against Rice Blast Induced by Probenazole
Source: MDPI journal article supplement (doi:10.3390/metabo11040246), 2021-04-16
Supplement: s1 [file s1]

**Supplementary Table Changes in rice plants metabolites after exposure to probenazole**

| Metabolites <sup>a</sup>      | RT (min) <sup>b</sup> | M/Z <sup>c</sup> | Score values | Fold Change <sup>d</sup> |        |        |
|-------------------------------|-----------------------|------------------|--------------|--------------------------|--------|--------|
|                               |                       |                  |              | B vs A                   | C vs A | D vs A |
| Valine                        | 8.44                  | 144              | 94.80        | 0.73                     | 0.63   | 0.86   |
| Malonic acid                  | 8.78                  | 73               | 63.42        | 1.53                     | 1.59   | 2.06   |
| Ethanolamine                  | 9.13                  | 174              | 94.40        | 1.14                     | 1.27   | 1.39   |
| Leucine                       | 9.20                  | 158              | 82.70        | 0.98                     | 0.66   | 1.01   |
| Phosphonic acid               | 9.28                  | 300              | 88.80        | 1.24                     | 1.69   | 1.45   |
| Proline                       | 9.55                  | 142              | 93.40        | 0.47                     | 0.39   | 0.66   |
| Glycerate                     | 10.03                 | 73               | 94.40        | 1.25                     | 1.66   | 1.36   |
| Citrulline                    | 10.55                 | 141              | 53.70        | 0.60                     | 0.58   | 0.76   |
| Threonine                     | 10.79                 | 73               | 95.50        | 0.80                     | 0.74   | 1.03   |
| 4-Ketoglucose                 | 10.88                 | 73               | 58.50        | 0.80                     | 1.16   | 1.56   |
| Aspartate                     | 11.17                 | 73               | 82.90        | 1.48                     | 1.78   | 2.48   |
| Malate                        | 12.01                 | 73               | 89.50        | 23.93                    | 13.62  | 40.27  |
| Salicylic acid                | 12.30                 | 267              | 85.30        | 1.13                     | 1.35   | 1.25   |
| Pipecolic acid                | 12.48                 | 258              | 77.60        | 0.85                     | 0.97   | 1.23   |
| $\gamma$ -aminobutyrate       | 12.51                 | 84               | 89.80        | 1.15                     | 0.76   | 1.09   |
| Homoserine                    | 13.05                 | 218              | 56.70        | 1.10                     | 1.06   | 1.88   |
| Phenylalanine                 | 13.68                 | 218              | 86.50        | 0.53                     | 0.43   | 0.98   |
| L-Alanine                     | 13.77                 | 116              | 68.93        | 1.30                     | 1.25   | 1.45   |
| Cyclooctasiloxane             | 14.00                 | 355              | 87.90        | 4.42                     | 2.66   | 7.93   |
| Asparagine                    | 14.19                 | 275              | 89.00        | 0.89                     | 0.79   | 1.28   |
| Glutamine                     | 15.31                 | 357              | 88.40        | 1.53                     | 1.96   | 2.37   |
| Tagatofuranose                | 15.35                 | 217              | 64.50        | 2.02                     | 2.80   | 3.87   |
| Terephthalic acid             | 15.44                 | 295              | 69.50        | 0.93                     | 0.27   | 0.14   |
| 2-Keto-1-gluconic acid        | 15.56                 | 133              | 64.10        | 1.06                     | 2.77   | 2.61   |
| Shikimic acid                 | 15.73                 | 429              | 87.20        | >100                     | >100   | >100   |
| Fructose                      | 16.31                 | 218              | 70.00        | >100                     | >100   | >100   |
| Glucuronic acid               | 16.49                 | 288              | 71.90        | 1.65                     | 1.33   | 2.19   |
| $\alpha$ -D-Galactopyranoside | 16.72                 | 204              | 85.00        | 0.42                     | 0.30   | 0.31   |
| Ascorbate                     | 17.23                 | 73               | 59.50        | 1.28                     | 1.35   | 2.25   |
| Glycine                       | 17.28                 | 73               | 83.50        | 6.43                     | 3.57   | 11.13  |
| Gluconate                     | 17.75                 | 73               | 81.20        | 2.10                     | 1.45   | 2.28   |
| Palmitate                     | 17.90                 | 313              | 93.90        | 1.63                     | 1.77   | 2.50   |
| Galacturonic                  | 17.98                 | 73               | 82.00        | 1.63                     | 1.45   | 1.89   |
| Succinate                     | 18.27                 | 73               | 61.80        | 1.38                     | 1.51   | 1.47   |
| Myo-Inositol                  | 18.64                 | 305              | 94.20        | 1.25                     | 1.17   | 1.22   |
| Octadecane                    | 18.75                 | 71               | 63.70        | >100                     | >100   | >100   |
| $\alpha$ -D-Glucopyranose     | 18.80                 | 73               | 57.00        | 1.54                     | 1.36   | 1.65   |
| Phytol                        | 19.09                 | 143              | 70.60        | 1.35                     | 1.11   | 1.93   |

|                             |       |     |       |      |      |      |
|-----------------------------|-------|-----|-------|------|------|------|
| Maltose                     | 19.45 | 68  | 84.60 | 3.16 | 3.01 | 5.59 |
| Stearate                    | 19.67 | 341 | 86.60 | 1.86 | 1.97 | 3.02 |
| D-Glucopyranosiduronic acid | 19.94 | 253 | 65.80 | >100 | >100 | >100 |
| Cyclononasiloxane           | 19.97 | 73  | 79.10 | >100 | >100 | >100 |
| Lactulose                   | 20.47 | 204 | 70.20 | 1.66 | 1.09 | 2.77 |
| D-glucose-6-phosphate       | 20.75 | 387 | 91.30 | 2.15 | 2.18 | 2.20 |
| D-Glucose                   | 20.91 | 73  | 84.70 | 2.64 | 2.83 | 2.80 |
| Serotonin                   | 21.65 | 174 | 81.40 | 1.58 | 1.97 | 1.31 |
| Cellobiose                  | 22.07 | 204 | 74.10 | 2.36 | 1.75 | 2.75 |
| 3,4-Dihydroxymandelic acid  | 22.27 | 73  | 79.60 | >100 | >100 | >100 |
| Fructose-1,6-diphosphate    | 22.64 | 73  | 87.90 | 5.44 | 3.48 | 4.19 |
| Turanose                    | 22.69 | 73  | 79.10 | 3.03 | 2.43 | 2.09 |
| Sucrose                     | 23.59 | 103 | 90.10 | 1.36 | 2.56 | 2.61 |
| D-Trehalose                 | 23.81 | 361 | 82.80 | 9.69 | 7.89 | 6.85 |
| Aucubin                     | 25.21 | 73  | 57.90 | >100 | >100 | >100 |
| Galactose                   | 25.84 | 204 | 88.10 | 2.77 | 1.67 | 3.42 |

<sup>a</sup>A metabolite was selected. If the content changed significantly ( $P < 0.05$ ) in probenazole-treated rice for at least three out of five sampling times compared with non-treated rice. <sup>b</sup>RT = retention time. <sup>c</sup>m/z = mass-to-charge ratio. <sup>d</sup>The metabolites contents changed in probenazole-treated rice seedlings inoculated *Magnaporthe grisea* compared with non- treated ( $P < 0.05$ ). Numbers greater and less than 1 represent an up-regulation and down-regulation of metabolites, respectively.
